# Supplementary material for: Phosphorylation/dephosphorylation response to light stimuli of Symbiodinium proteins: specific light-induced dephosphorylation of an HSP-like 75 kDa protein from S. microadriaticum
Source: PeerJ journal article supplement (doi:10.7717/peerj.7406), 2019-08-12

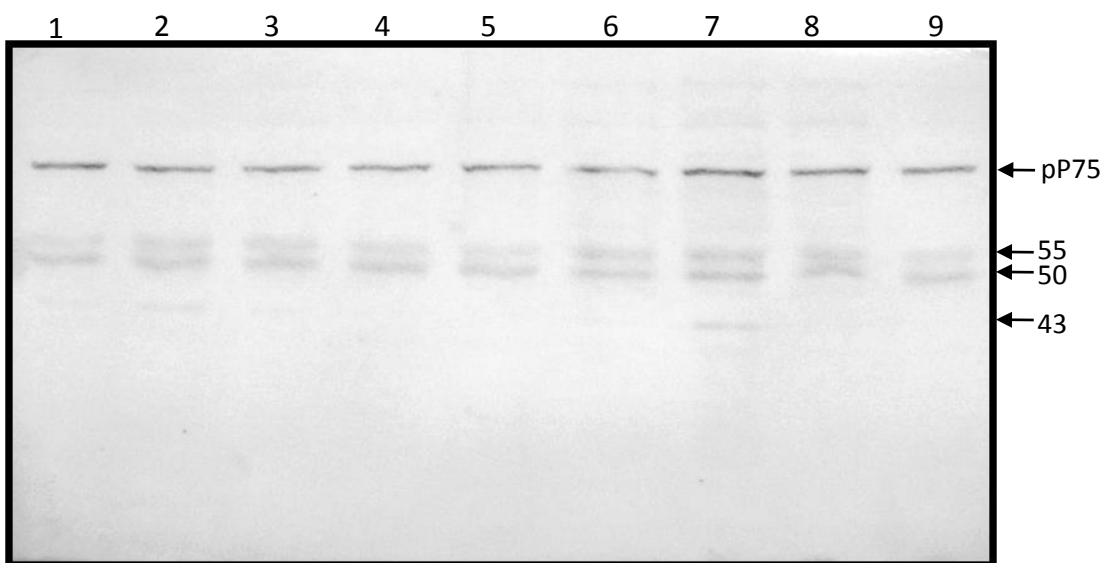

Supplement: Fig_S3.pdf [file Fig_S3.pdf]
